# Supplementary material
Source: publisher figshare collection journal article supplement (https://acs.figshare.com/ndownloader/files/8740942)
Supplement: Supplementary file 1 [file 8740942]

Compound_ID	SMILES
9	ClCC1CN(C(C(N2)=CC3=C2C=CC(OCCN(C)C)=C3)=O)C4=C1C(C=CC(S(NCCOP(O)(O)=O)(=O)=O)=C5)=C5C([N+]([O-])=O)=C4.C
10	ClCC1CN(C(C(N2)=CC3=C2C(OC)=C(OC)C(OC)=C3)=O)C4=C1C(C=CC(S(NCCO)(=O)=O)=C5)=C5C([N+]([O-])=O)=C4.C
11	ClCC1CN(C(C(N2)=CC3=C2C=CC(OCCN(C)C)=C3)=O)C4=C1C(C=CC(S(NCCO)(=O)=O)=C5)=C5C([N+]([O-])=O)=C4.C
12	ClCC1CN(C(C(N2)=CC3=C2C=CC(OCCN(CC)CC)=C3)=O)C4=C1C(C=CC(S(NCCO)(=O)=O)=C5)=C5C([N+]([O-])=O)=C4
13	ClCC1CN(C(C(N2)=CC3=C2C=CC(OCCCN(C)C)=C3)=O)C4=C1C(C=CC(S(NCCO)(=O)=O)=C5)=C5C([N+]([O-])=O)=C4
14	ClCC1CN(C(C(N2)=CC3=C2C=CC(CN(C)C)=C3)=O)C4=C1C(C=CC(S(NCCO)(=O)=O)=C5)=C5C([N+]([O-])=O)=C4
15	ClCC1CN(C(C(N2)=CC3=C2C=CC(N(C)C)=C3)=O)C4=C1C(C=CC(S(NCCO)(=O)=O)=C5)=C5C([N+]([O-])=O)=C4
16	ClCC1CN(C(C(N2)=CC3=C2C=CC(OCCN4CCOCC4)=C3)=O)C5=C1C(C=CC(S(NCCO)(=O)=O)=C6)=C6C([N+]([O-])=O)=C5
17	ClCC1CN(C(C(N2)=CC3=C2C=CC(OCCCN4CCOCC4)=C3)=O)C5=C1C(C=CC(S(NCCO)(=O)=O)=C6)=C6C([N+]([O-])=O)=C5
18	ClCC1CN(C(C(N2)=CC3=C2C=CC(NC(CN(C)C)=O)=C3)=O)C4=C1C(C=CC(S(NCCO)(=O)=O)=C5)=C5C([N+]([O-])=O)=C4
19	ClCC1CN(C(C(N2)=CC3=C2C=CC(NC(CCN(C)C)=O)=C3)=O)C4=C1C(C=CC(S(NCCO)(=O)=O)=C5)=C5C([N+]([O-])=O)=C4
20	ClCC1CN(C(/C=C/C2=CC=C(OCCN3CCOCC3)C=C2)=O)C4=C1C(C=CC(S(NCCO)(=O)=O)=C5)=C5C([N+]([O-])=O)=C4
21	ClCC1CN(C(/C=C/C2=CC=C(OCCCN3CCOCC3)C=C2)=O)C4=C1C(C=CC(S(NCCO)(=O)=O)=C5)=C5C([N+]([O-])=O)=C4
22	ClCC1CN(C(/C=C/C2=CC=C(OCCN3CCN(C)CC3)C=C2)=O)C4=C1C(C=CC(S(NCCO)(=O)=O)=C5)=C5C([N+]([O-])=O)=C4
23	ClCC1CN(C(C2=CC=C(OCCN3CCOCC3)C=C2)=O)C4=C1C(C=CC(S(NCCO)(=O)=O)=C5)=C5C([N+]([O-])=O)=C4
24	ClCC1CN(C(CCN2CCOCC2)=O)C3=C1C(C=CC(S(NCCO)(=O)=O)=C4)=C4C([N+]([O-])=O)=C3
25	ClCC1CN(C(C(N2)=CC3=C2C(OC)=C(OC)C(OC)=C3)=O)C4=C1C(C=CC(C(NCCO)=O)=C5)=C5C([N+]([O-])=O)=C4.C
26	ClCC1CN(C(C(N2)=CC3=C2C=CC(OCCN(C)C)=C3)=O)C4=C1C(C=CC(C(NCCO)=O)=C5)=C5C([N+]([O-])=O)=C4.C
27	ClCC1CN(C(C(N2)=CC3=C2C=CC(OCCN4CCOCC4)=C3)=O)C5=C1C(C=CC(C(NCCO)=O)=C6)=C6C([N+]([O-])=O)=C5
28	ClCC1CN(C(/C=C/C2=CC=C(OCCN3CCOCC3)C=C2)=O)C4=C1C(C=CC(C(NCCO)=O)=C5)=C5C([N+]([O-])=O)=C4
29	ClCC1CN(C(C(N2)=CC3=C2C(OC)=C(OC)C(OC)=C3)=O)C4=C1C(C=CC(S(NCCO)(=O)=O)=C5)=C5C(N)=C4.C
30	ClCC1CN(C(C(N2)=CC3=C2C=CC(OCCN(C)C)=C3)=O)C4=C1C(C=CC(S(NCCO)(=O)=O)=C5)=C5C(N)=C4.C
31	ClCC1CN(C(C(N2)=CC3=C2C=CC(OCCN(CC)CC)=C3)=O)C4=C1C(C=CC(S(NCCO)(=O)=O)=C5)=C5C(N)=C4
32	ClCC1CN(C(C(N2)=CC3=C2C=CC(OCCCN(C)C)=C3)=O)C4=C1C(C=CC(S(NCCO)(=O)=O)=C5)=C5C(N)=C4
33	ClCC1CN(C(C(N2)=CC3=C2C=CC(CN(C)C)=C3)=O)C4=C1C(C=CC(S(NCCO)(=O)=O)=C5)=C5C(N)=C4
34	ClCC1CN(C(C(N2)=CC3=C2C=CC(N(C)C)=C3)=O)C4=C1C(C=CC(S(NCCO)(=O)=O)=C5)=C5C(N)=C4
35	ClCC1CN(C(C(N2)=CC3=C2C=CC(OCCN4CCOCC4)=C3)=O)C5=C1C(C=CC(S(NCCO)(=O)=O)=C6)=C6C(N)=C5
36	ClCC1CN(C(C(N2)=CC3=C2C=CC(OCCCN4CCOCC4)=C3)=O)C5=C1C(C=CC(S(NCCO)(=O)=O)=C6)=C6C(N)=C5
37	ClCC1CN(C(C(N2)=CC3=C2C=CC(NC(CN(C)C)=O)=C3)=O)C4=C1C(C=CC(S(NCCO)(=O)=O)=C5)=C5C(N)=C4
38	ClCC1CN(C(C(N2)=CC3=C2C=CC(NC(CCN(C)C)=O)=C3)=O)C4=C1C(C=CC(S(NCCO)(=O)=O)=C5)=C5C(N)=C4
39	ClCC1CN(C(/C=C/C2=CC=C(OCCN3CCOCC3)C=C2)=O)C4=C1C(C=CC(S(NCCO)(=O)=O)=C5)=C5C(N)=C4
40	ClCC1CN(C(/C=C/C2=CC=C(OCCCN3CCOCC3)C=C2)=O)C4=C1C(C=CC(S(NCCO)(=O)=O)=C5)=C5C(N)=C4
41	ClCC1CN(C(C2=CC=C(OCCN3CCOCC3)C=C2)=O)C4=C1C(C=CC(S(NCCO)(=O)=O)=C5)=C5C(N)=C4
42	ClCC1CN(C(CCN2CCOCC2)=O)C3=C1C(C=CC(S(NCCO)(=O)=O)=C4)=C4C(N)=C3
43	ClCC1CN(C(C(N2)=CC3=C2C=CC(OCCN(C)C)=C3)=O)C4=C1C(C=CC(C(NCCO)=O)=C5)=C5C(N)=C4.C
44	ClCC1CN(C(C(N2)=CC3=C2C=CC(OCCN4CCOCC4)=C3)=O)C5=C1C(C=CC(C(NCCO)=O)=C6)=C6C(N)=C5
45	ClCC1CN(C(C(N2)=CC3=C2C(OC)=C(OC)C(OC)=C3)=O)C4=C1C(C=CC(S(NCCOP(O)(O)=O)(=O)=O)=C5)=C5C([N+]([O-])=O)=C4.C
46	O=C(N(CC1CCl)C2=C1C(C=CC(S(NCCOP(O)(O)=O)(=O)=O)=C3)=C3C([N+]([O-])=O)=C2)C(N4)=CC5=C4C=CC(OCCN(CC)CC)=C5
47	O=C(N(CC1CCl)C2=C1C(C=CC(S(NCCOP(O)(O)=O)(=O)=O)=C3)=C3C([N+]([O-])=O)=C2)C(N4)=CC5=C4C=CC(OCCCN(C)C)=C5
48	O=C(N(CC1CCl)C2=C1C(C=CC(S(NCCOP(O)(O)=O)(=O)=O)=C3)=C3C([N+]([O-])=O)=C2)C(N4)=CC5=C4C=CC(CN(C)C)=C5
49	O=C(N(CC1CCl)C2=C1C(C=CC(S(NCCOP(O)(O)=O)(=O)=O)=C3)=C3C([N+]([O-])=O)=C2)C(N4)=CC5=C4C=CC(N(C)C)=C5
50	O=C(N(CC1CCl)C2=C1C(C=CC(S(NCCOP(O)(O)=O)(=O)=O)=C3)=C3C([N+]([O-])=O)=C2)C(N4)=CC5=C4C=CC(OCCN6CCOCC6)=C5
51	O=C(N(CC1CCl)C2=C1C(C=CC(S(NCCOP(O)(O)=O)(=O)=O)=C3)=C3C([N+]([O-])=O)=C2)C(N4)=CC5=C4C=CC(OCCCN6CCOCC6)=C5
52	O=C(N(CC1CCl)C2=C1C(C=CC(S(NCCOP(O)(O)=O)(=O)=O)=C3)=C3C([N+]([O-])=O)=C2)C(N4)=CC5=C4C=CC(NC(CN(C)C)=O)=C5
53	O=C(N(CC1CCl)C2=C1C(C=CC(S(NCCOP(O)(O)=O)(=O)=O)=C3)=C3C([N+]([O-])=O)=C2)C(N4)=CC5=C4C=CC(NC(CCN(C)C)=O)=C5
54	O=C(N(CC1CCl)C2=C1C(C=CC(S(NCCOP(O)(O)=O)(=O)=O)=C3)=C3C([N+]([O-])=O)=C2)/C=C/C4=CC=C(OCCN5CCOCC5)C=C4
55	O=C(N(CC1CCl)C2=C1C(C=CC(S(NCCOP(O)(O)=O)(=O)=O)=C3)=C3C([N+]([O-])=O)=C2)/C=C/C4=CC=C(OCCCN5CCOCC5)C=C4
56	O=C(N(CC1CCl)C2=C1C(C=CC(S(NCCOP(O)(O)=O)(=O)=O)=C3)=C3C([N+]([O-])=O)=C2)/C=C/C4=CC=C(OCCN5CCN(C)CC5)C=C4
57	O=C(N(CC1CCl)C2=C1C(C=CC(S(NCCOP(O)(O)=O)(=O)=O)=C3)=C3C([N+]([O-])=O)=C2)C4=CC=C(OCCN5CCOCC5)C=C4
58	O=C(N(CC1CCl)C2=C1C(C=CC(S(NCCOP(O)(O)=O)(=O)=O)=C3)=C3C([N+]([O-])=O)=C2)CCN4CCOCC4
59	ClCC1CN(C(C(N2)=CC3=C2C=CC(OCCN(C)C)=C3)=O)C4=C1C(C=CC(C(NCCOP(O)(O)=O)=O)=C5)=C5C([N+]([O-])=O)=C4.C
60	O=C(C(N1)=CC2=C1C=CC(OCCN3CCOCC3)=C2)N(CC4CCl)C5=C4C(C=CC(C(NCCOP(O)(O)=O)=O)=C6)=C6C([N+]([O-])=O)=C5
61	O=C(N(CC1CCl)C2=C1C(C=CC(C(NCCOP(O)(O)=O)=O)=C3)=C3C([N+]([O-])=O)=C2)/C=C/C4=CC=C(OCCN5CCOCC5)C=C4
